# Supplementary material for: Italian neonatal birthweight charts derived from INeS not separated by birth order
Source: Springer Nature journal article supplement (doi:10.1186/s13052-024-01660-7), 2024-04-29
Supplement: MOESM1 [file 27035082]

Appendix 1. 3<sup>rd</sup>, 10<sup>th</sup>, 25<sup>th</sup>, 50<sup>th</sup> (M), 75<sup>th</sup>, 90<sup>th</sup>, 97<sup>th</sup> centiles and L(t), S(t) parameter by sex and GA for birthweight.  $SDS = \frac{(BW/M)^L - 1}{L \times S}$ . Completed weeks has to be compared with bold rows.

| GA<br>(wks+days) |          | Girls         |               |            |            |             |             |             |             |             | Boys          |               |            |            |             |             |             |             |             |
|------------------|----------|---------------|---------------|------------|------------|-------------|-------------|-------------|-------------|-------------|---------------|---------------|------------|------------|-------------|-------------|-------------|-------------|-------------|
| wks              | days     | L             | S             | 3rd        | 10th       | 25th        | 50th (M)    | 75th        | 90th        | 97th        | L             | S             | 3rd        | 10th       | 25th        | 50th (M)    | 75th        | 90th        | 97th        |
| 23               | 0        | 1.1520        | 0.1386        | 382        | 427        | 471         | 520         | 569         | 611         | 653         | 1.1642        | 0.1334        | 404        | 449        | 494         | 543         | 592         | 635         | 677         |
| 23               | 1        | 1.1417        | 0.1435        | 384        | 431        | 478         | 530         | 581         | 626         | 670         | 1.1531        | 0.1381        | 406        | 454        | 501         | 553         | 605         | 650         | 695         |
| 23               | 2        | 1.1328        | 0.1482        | 386        | 436        | 485         | 539         | 593         | 641         | 687         | 1.1435        | 0.1426        | 409        | 459        | 509         | 564         | 617         | 665         | 712         |
| <b>23</b>        | <b>3</b> | <b>1.1250</b> | <b>0.1527</b> | <b>388</b> | <b>440</b> | <b>492</b>  | <b>549</b>  | <b>606</b>  | <b>656</b>  | <b>705</b>  | <b>1.1352</b> | <b>0.1469</b> | <b>412</b> | <b>464</b> | <b>517</b>  | <b>574</b>  | <b>630</b>  | <b>681</b>  | <b>730</b>  |
| 23               | 4        | 1.1182        | 0.1569        | 391        | 445        | 500         | 559         | 618         | 671         | 722         | 1.1279        | 0.1510        | 415        | 470        | 524         | 584         | 643         | 696         | 748         |
| 23               | 5        | 1.1122        | 0.1610        | 394        | 451        | 507         | 570         | 631         | 686         | 740         | 1.1214        | 0.1549        | 418        | 475        | 532         | 595         | 657         | 712         | 766         |
| 23               | 6        | 1.1069        | 0.1649        | 397        | 456        | 515         | 580         | 644         | 701         | 757         | 1.1157        | 0.1586        | 422        | 481        | 541         | 606         | 670         | 728         | 784         |
| 24               | 0        | 1.1022        | 0.1686        | 400        | 461        | 523         | 591         | 657         | 717         | 775         | 1.1107        | 0.1621        | 425        | 487        | 549         | 617         | 684         | 744         | 802         |
| 24               | 1        | 1.0980        | 0.1721        | 403        | 467        | 531         | 601         | 671         | 733         | 793         | 1.1062        | 0.1655        | 429        | 493        | 558         | 628         | 698         | 760         | 821         |
| 24               | 2        | 1.0943        | 0.1755        | 407        | 473        | 540         | 612         | 685         | 749         | 812         | 1.1021        | 0.1687        | 433        | 500        | 567         | 640         | 712         | 777         | 840         |
| <b>24</b>        | <b>3</b> | <b>1.0909</b> | <b>0.1786</b> | <b>410</b> | <b>479</b> | <b>548</b>  | <b>624</b>  | <b>698</b>  | <b>765</b>  | <b>830</b>  | <b>1.0985</b> | <b>0.1718</b> | <b>437</b> | <b>506</b> | <b>576</b>  | <b>652</b>  | <b>727</b>  | <b>794</b>  | <b>859</b>  |
| 24               | 4        | 1.0879        | 0.1817        | 414        | 486        | 557         | 635         | 713         | 782         | 849         | 1.0952        | 0.1746        | 442        | 513        | 585         | 663         | 741         | 810         | 878         |
| 24               | 5        | 1.0852        | 0.1845        | 418        | 492        | 566         | 647         | 727         | 798         | 868         | 1.0923        | 0.1774        | 446        | 520        | 594         | 676         | 756         | 828         | 898         |
| 24               | 6        | 1.0827        | 0.1872        | 423        | 499        | 575         | 659         | 741         | 815         | 887         | 1.0896        | 0.1799        | 451        | 527        | 604         | 688         | 771         | 845         | 918         |
| 25               | 0        | 1.0805        | 0.1897        | 427        | 506        | 584         | 671         | 756         | 832         | 907         | 1.0872        | 0.1824        | 456        | 535        | 614         | 701         | 786         | 863         | 938         |
| 25               | 1        | 1.0784        | 0.1921        | 432        | 513        | 594         | 683         | 771         | 850         | 927         | 1.0850        | 0.1847        | 461        | 543        | 624         | 713         | 802         | 881         | 958         |
| 25               | 2        | 1.0766        | 0.1944        | 437        | 520        | 604         | 695         | 786         | 867         | 946         | 1.0831        | 0.1868        | 467        | 551        | 634         | 726         | 817         | 899         | 978         |
| <b>25</b>        | <b>3</b> | <b>1.0749</b> | <b>0.1965</b> | <b>442</b> | <b>528</b> | <b>614</b>  | <b>708</b>  | <b>802</b>  | <b>885</b>  | <b>967</b>  | <b>1.0813</b> | <b>0.1889</b> | <b>473</b> | <b>559</b> | <b>645</b>  | <b>740</b>  | <b>833</b>  | <b>917</b>  | <b>999</b>  |
| 25               | 4        | 1.0734        | 0.1985        | 448        | 536        | 624         | 721         | 817         | 903         | 987         | 1.0797        | 0.1908        | 478        | 567        | 656         | 753         | 850         | 936         | 1020        |
| 25               | 5        | 1.0721        | 0.2003        | 453        | 544        | 635         | 734         | 833         | 921         | 1008        | 1.0782        | 0.1925        | 485        | 576        | 667         | 767         | 866         | 955         | 1041        |
| 25               | 6        | 1.0708        | 0.2021        | 459        | 552        | 645         | 748         | 849         | 940         | 1028        | 1.0769        | 0.1942        | 491        | 585        | 678         | 781         | 883         | 974         | 1063        |
| 26               | 0        | 1.0697        | 0.2037        | 465        | 561        | 656         | 761         | 865         | 958         | 1050        | 1.0757        | 0.1957        | 498        | 594        | 690         | 795         | 900         | 993         | 1084        |
| 26               | 1        | 1.0687        | 0.2052        | 471        | 569        | 667         | 775         | 882         | 977         | 1071        | 1.0746        | 0.1971        | 505        | 603        | 702         | 810         | 917         | 1013        | 1107        |
| 26               | 2        | 1.0678        | 0.2065        | 478        | 578        | 679         | 789         | 899         | 997         | 1093        | 1.0736        | 0.1985        | 512        | 613        | 714         | 825         | 935         | 1033        | 1129        |
| <b>26</b>        | <b>3</b> | <b>1.0670</b> | <b>0.2078</b> | <b>485</b> | <b>588</b> | <b>691</b>  | <b>804</b>  | <b>916</b>  | <b>1016</b> | <b>1115</b> | <b>1.0727</b> | <b>0.1997</b> | <b>519</b> | <b>623</b> | <b>726</b>  | <b>840</b>  | <b>952</b>  | <b>1053</b> | <b>1151</b> |
| 26               | 4        | 1.0663        | 0.2090        | 492        | 597        | 703         | 819         | 933         | 1036        | 1137        | 1.0719        | 0.2008        | 527        | 633        | 739         | 855         | 970         | 1073        | 1174        |
| 26               | 5        | 1.0656        | 0.2100        | 499        | 607        | 715         | 834         | 951         | 1056        | 1159        | 1.0713        | 0.2018        | 535        | 643        | 752         | 871         | 989         | 1094        | 1197        |
| 26               | 6        | 1.0651        | 0.2110        | 507        | 617        | 727         | 849         | 969         | 1077        | 1182        | 1.0706        | 0.2027        | 543        | 654        | 765         | 887         | 1007        | 1115        | 1221        |
| 27               | 0        | 1.0646        | 0.2118        | 515        | 627        | 740         | 864         | 987         | 1097        | 1205        | 1.0701        | 0.2035        | 552        | 665        | 778         | 903         | 1026        | 1136        | 1244        |
| 27               | 1        | 1.0642        | 0.2126        | 523        | 638        | 753         | 880         | 1006        | 1118        | 1228        | 1.0697        | 0.2043        | 561        | 676        | 792         | 919         | 1046        | 1158        | 1268        |
| 27               | 2        | 1.0638        | 0.2133        | 531        | 649        | 767         | 896         | 1025        | 1139        | 1252        | 1.0693        | 0.2049        | 570        | 688        | 806         | 936         | 1065        | 1180        | 1293        |
| <b>27</b>        | <b>3</b> | <b>1.0635</b> | <b>0.2139</b> | <b>540</b> | <b>660</b> | <b>780</b>  | <b>913</b>  | <b>1044</b> | <b>1161</b> | <b>1276</b> | <b>1.0690</b> | <b>0.2055</b> | <b>579</b> | <b>700</b> | <b>821</b>  | <b>953</b>  | <b>1085</b> | <b>1202</b> | <b>1317</b> |
| 27               | 4        | 1.0633        | 0.2144        | 549        | 672        | 794         | 929         | 1063        | 1183        | 1300        | 1.0687        | 0.2059        | 589        | 712        | 835         | 971         | 1105        | 1225        | 1342        |
| 27               | 5        | 1.0631        | 0.2148        | 558        | 683        | 809         | 946         | 1083        | 1205        | 1324        | 1.0685        | 0.2063        | 599        | 724        | 850         | 989         | 1125        | 1248        | 1368        |
| 27               | 6        | 1.0630        | 0.2151        | 568        | 695        | 823         | 964         | 1103        | 1227        | 1349        | 1.0684        | 0.2067        | 609        | 737        | 866         | 1007        | 1146        | 1271        | 1393        |
| 28               | 0        | 1.0629        | 0.2154        | 578        | 708        | 838         | 981         | 1123        | 1250        | 1374        | 1.0683        | 0.2069        | 620        | 750        | 881         | 1025        | 1167        | 1295        | 1419        |
| 28               | 1        | 1.0629        | 0.2156        | 588        | 720        | 853         | 999         | 1144        | 1273        | 1400        | 1.0683        | 0.2071        | 631        | 764        | 897         | 1044        | 1189        | 1318        | 1446        |
| 28               | 2        | 1.0629        | 0.2157        | 598        | 733        | 869         | 1017        | 1165        | 1296        | 1426        | 1.0683        | 0.2072        | 642        | 778        | 914         | 1063        | 1211        | 1343        | 1472        |
| <b>28</b>        | <b>3</b> | <b>1.0630</b> | <b>0.2157</b> | <b>609</b> | <b>747</b> | <b>885</b>  | <b>1036</b> | <b>1186</b> | <b>1320</b> | <b>1452</b> | <b>1.0684</b> | <b>0.2073</b> | <b>654</b> | <b>792</b> | <b>930</b>  | <b>1082</b> | <b>1233</b> | <b>1367</b> | <b>1499</b> |
| 28               | 4        | 1.0631        | 0.2157        | 620        | 760        | 901         | 1055        | 1208        | 1344        | 1478        | 1.0686        | 0.2072        | 666        | 806        | 947         | 1102        | 1255        | 1392        | 1526        |
| 28               | 5        | 1.0633        | 0.2156        | 632        | 774        | 917         | 1074        | 1230        | 1369        | 1505        | 1.0688        | 0.2072        | 678        | 821        | 965         | 1122        | 1278        | 1418        | 1554        |
| 28               | 6        | 1.0636        | 0.2155        | 644        | 789        | 934         | 1094        | 1252        | 1393        | 1532        | 1.0690        | 0.2070        | 691        | 836        | 982         | 1143        | 1301        | 1443        | 1582        |
| 29               | 0        | 1.0639        | 0.2153        | 656        | 803        | 951         | 1114        | 1275        | 1419        | 1560        | 1.0694        | 0.2068        | 704        | 852        | 1000        | 1163        | 1325        | 1469        | 1611        |
| 29               | 1        | 1.0642        | 0.2150        | 668        | 818        | 969         | 1134        | 1298        | 1444        | 1587        | 1.0697        | 0.2066        | 717        | 868        | 1019        | 1185        | 1349        | 1496        | 1639        |
| 29               | 2        | 1.0646        | 0.2147        | 681        | 834        | 987         | 1155        | 1321        | 1470        | 1616        | 1.0702        | 0.2063        | 731        | 884        | 1038        | 1206        | 1373        | 1522        | 1669        |
| <b>29</b>        | <b>3</b> | <b>1.0651</b> | <b>0.2143</b> | <b>694</b> | <b>850</b> | <b>1005</b> | <b>1176</b> | <b>1345</b> | <b>1496</b> | <b>1644</b> | <b>1.0707</b> | <b>0.2059</b> | <b>745</b> | <b>901</b> | <b>1057</b> | <b>1228</b> | <b>1398</b> | <b>1550</b> | <b>1698</b> |
| 29               | 4        | 1.0656        | 0.2139        | 708        | 866        | 1024        | 1197        | 1369        | 1523        | 1673        | 1.0712        | 0.2055        | 759        | 918        | 1076        | 1251        | 1423        | 1577        | 1728        |
| 29               | 5        | 1.0662        | 0.2134        | 722        | 882        | 1043        | 1219        | 1394        | 1550        | 1703        | 1.0719        | 0.2050        | 774        | 935        | 1096        | 1273        | 1449        | 1605        | 1759        |
| 29               | 6        | 1.0668        | 0.2129        | 736        | 899        | 1062        | 1241        | 1419        | 1577        | 1732        | 1.0725        | 0.2045        | 790        | 953        | 1117        | 1297        | 1475        | 1634        | 1789        |

| GA<br>(wks+days) |          |   | Girls         |               |             |             |             |             |             |             |             |   | Boys          |               |             |             |             |             |             |             |             |
|------------------|----------|---|---------------|---------------|-------------|-------------|-------------|-------------|-------------|-------------|-------------|---|---------------|---------------|-------------|-------------|-------------|-------------|-------------|-------------|-------------|
| wks              | days     | L | S             | 3rd           | days        |             | L           | S           | 3rd         | days        |             | L | S             | 3rd           | days        |             | L           | S           | 3rd         | days        | 97th        |
| 30               | 0        |   | 1.0675        | 0.2123        | 751         | 916         | 1082        | 1264        | 1444        | 1605        | 1763        |   | 1.0733        | 0.2040        | 805         | 971         | 1138        | 1320        | 1501        | 1662        | 1820        |
| 30               | 1        |   | 1.0683        | 0.2117        | 766         | 934         | 1102        | 1287        | 1470        | 1633        | 1793        |   | 1.0741        | 0.2034        | 821         | 990         | 1159        | 1344        | 1528        | 1692        | 1852        |
| 30               | 2        |   | 1.0691        | 0.2110        | 782         | 952         | 1123        | 1310        | 1496        | 1662        | 1824        |   | 1.0750        | 0.2027        | 838         | 1009        | 1181        | 1369        | 1555        | 1721        | 1884        |
| <b>30</b>        | <b>3</b> |   | <b>1.0700</b> | <b>0.2103</b> | <b>798</b>  | <b>971</b>  | <b>1144</b> | <b>1334</b> | <b>1522</b> | <b>1691</b> | <b>1855</b> |   | <b>1.0760</b> | <b>0.2020</b> | <b>855</b>  | <b>1029</b> | <b>1203</b> | <b>1394</b> | <b>1583</b> | <b>1751</b> | <b>1916</b> |
| 30               | 4        |   | 1.0710        | 0.2096        | 814         | 990         | 1165        | 1358        | 1549        | 1720        | 1887        |   | 1.0771        | 0.2013        | 872         | 1049        | 1225        | 1419        | 1611        | 1782        | 1949        |
| 30               | 5        |   | 1.0721        | 0.2088        | 831         | 1009        | 1187        | 1383        | 1577        | 1750        | 1919        |   | 1.0783        | 0.2006        | 890         | 1069        | 1248        | 1445        | 1639        | 1813        | 1983        |
| 30               | 6        |   | 1.0733        | 0.2079        | 848         | 1029        | 1210        | 1408        | 1605        | 1780        | 1952        |   | 1.0796        | 0.1998        | 908         | 1090        | 1272        | 1471        | 1668        | 1844        | 2016        |
| 31               | 0        |   | 1.0746        | 0.2071        | 866         | 1049        | 1232        | 1434        | 1633        | 1811        | 1985        |   | 1.0810        | 0.1989        | 927         | 1111        | 1295        | 1498        | 1697        | 1876        | 2050        |
| 31               | 1        |   | 1.0760        | 0.2062        | 884         | 1070        | 1255        | 1460        | 1661        | 1842        | 2018        |   | 1.0825        | 0.1981        | 946         | 1133        | 1320        | 1525        | 1727        | 1908        | 2085        |
| 31               | 2        |   | 1.0775        | 0.2052        | 902         | 1091        | 1279        | 1486        | 1691        | 1873        | 2052        |   | 1.0841        | 0.1972        | 966         | 1155        | 1345        | 1552        | 1758        | 1941        | 2120        |
| <b>31</b>        | <b>3</b> |   | <b>1.0791</b> | <b>0.2043</b> | <b>921</b>  | <b>1112</b> | <b>1303</b> | <b>1513</b> | <b>1720</b> | <b>1905</b> | <b>2086</b> |   | <b>1.0859</b> | <b>0.1962</b> | <b>986</b>  | <b>1178</b> | <b>1370</b> | <b>1580</b> | <b>1788</b> | <b>1974</b> | <b>2155</b> |
| 31               | 4        |   | 1.0809        | 0.2033        | 940         | 1134        | 1328        | 1540        | 1750        | 1937        | 2121        |   | 1.0878        | 0.1953        | 1007        | 1201        | 1396        | 1609        | 1819        | 2007        | 2191        |
| 31               | 5        |   | 1.0828        | 0.2022        | 960         | 1157        | 1353        | 1568        | 1780        | 1970        | 2156        |   | 1.0898        | 0.1943        | 1028        | 1225        | 1422        | 1638        | 1851        | 2041        | 2227        |
| 31               | 6        |   | 1.0848        | 0.2012        | 981         | 1180        | 1378        | 1596        | 1811        | 2003        | 2191        |   | 1.0921        | 0.1932        | 1049        | 1249        | 1448        | 1667        | 1883        | 2076        | 2264        |
| 32               | 0        |   | 1.0871        | 0.2000        | 1001        | 1203        | 1404        | 1625        | 1843        | 2037        | 2227        |   | 1.0945        | 0.1922        | 1071        | 1274        | 1476        | 1697        | 1916        | 2111        | 2301        |
| 32               | 1        |   | 1.0895        | 0.1989        | 1023        | 1227        | 1430        | 1654        | 1874        | 2071        | 2263        |   | 1.0971        | 0.1911        | 1094        | 1299        | 1503        | 1728        | 1949        | 2146        | 2339        |
| 32               | 2        |   | 1.0921        | 0.1977        | 1045        | 1251        | 1457        | 1683        | 1907        | 2105        | 2300        |   | 1.1000        | 0.1900        | 1117        | 1325        | 1532        | 1758        | 1982        | 2182        | 2377        |
| <b>32</b>        | <b>3</b> |   | <b>1.0950</b> | <b>0.1966</b> | <b>1067</b> | <b>1276</b> | <b>1485</b> | <b>1713</b> | <b>1939</b> | <b>2140</b> | <b>2337</b> |   | <b>1.1031</b> | <b>0.1888</b> | <b>1140</b> | <b>1351</b> | <b>1560</b> | <b>1790</b> | <b>2016</b> | <b>2218</b> | <b>2415</b> |
| 32               | 4        |   | 1.0980        | 0.1953        | 1090        | 1301        | 1513        | 1744        | 1972        | 2176        | 2374        |   | 1.1064        | 0.1876        | 1165        | 1377        | 1589        | 1822        | 2051        | 2255        | 2454        |
| 32               | 5        |   | 1.1014        | 0.1941        | 1113        | 1327        | 1541        | 1775        | 2006        | 2211        | 2412        |   | 1.1101        | 0.1864        | 1189        | 1405        | 1619        | 1854        | 2086        | 2292        | 2493        |
| 32               | 6        |   | 1.1050        | 0.1928        | 1137        | 1354        | 1570        | 1806        | 2040        | 2247        | 2450        |   | 1.1140        | 0.1852        | 1214        | 1432        | 1649        | 1887        | 2121        | 2329        | 2532        |
| 33               | 0        |   | 1.1089        | 0.1915        | 1161        | 1380        | 1599        | 1838        | 2074        | 2284        | 2489        |   | 1.1183        | 0.1839        | 1240        | 1461        | 1680        | 1920        | 2157        | 2367        | 2572        |
| 33               | 1        |   | 1.1132        | 0.1901        | 1186        | 1408        | 1629        | 1870        | 2109        | 2320        | 2527        |   | 1.1229        | 0.1826        | 1266        | 1489        | 1711        | 1954        | 2193        | 2405        | 2612        |
| 33               | 2        |   | 1.1178        | 0.1887        | 1211        | 1436        | 1659        | 1903        | 2144        | 2358        | 2566        |   | 1.1280        | 0.1813        | 1293        | 1519        | 1743        | 1988        | 2229        | 2444        | 2653        |
| <b>33</b>        | <b>3</b> |   | <b>1.1228</b> | <b>0.1873</b> | <b>1237</b> | <b>1464</b> | <b>1690</b> | <b>1936</b> | <b>2179</b> | <b>2395</b> | <b>2606</b> |   | <b>1.1334</b> | <b>0.1799</b> | <b>1320</b> | <b>1548</b> | <b>1775</b> | <b>2023</b> | <b>2266</b> | <b>2483</b> | <b>2694</b> |
| 33               | 4        |   | 1.1283        | 0.1859        | 1263        | 1493        | 1721        | 1970        | 2215        | 2433        | 2645        |   | 1.1393        | 0.1785        | 1348        | 1579        | 1808        | 2058        | 2304        | 2522        | 2735        |
| 33               | 5        |   | 1.1342        | 0.1844        | 1290        | 1522        | 1753        | 2004        | 2251        | 2471        | 2685        |   | 1.1457        | 0.1771        | 1376        | 1610        | 1841        | 2093        | 2342        | 2561        | 2776        |
| 33               | 6        |   | 1.1406        | 0.1829        | 1317        | 1552        | 1785        | 2039        | 2288        | 2509        | 2725        |   | 1.1527        | 0.1757        | 1405        | 1641        | 1875        | 2129        | 2380        | 2601        | 2817        |
| 34               | 0        |   | 1.1475        | 0.1814        | 1345        | 1582        | 1817        | 2073        | 2325        | 2548        | 2765        |   | 1.1602        | 0.1742        | 1434        | 1673        | 1909        | 2166        | 2418        | 2641        | 2859        |
| 34               | 1        |   | 1.1549        | 0.1799        | 1373        | 1613        | 1850        | 2109        | 2362        | 2587        | 2805        |   | 1.1683        | 0.1727        | 1464        | 1705        | 1943        | 2203        | 2457        | 2682        | 2901        |
| 34               | 2        |   | 1.1630        | 0.1783        | 1402        | 1644        | 1884        | 2144        | 2400        | 2626        | 2846        |   | 1.1771        | 0.1711        | 1495        | 1738        | 1979        | 2240        | 2496        | 2722        | 2942        |
| <b>34</b>        | <b>3</b> |   | <b>1.1717</b> | <b>0.1766</b> | <b>1431</b> | <b>1676</b> | <b>1918</b> | <b>2180</b> | <b>2437</b> | <b>2665</b> | <b>2886</b> |   | <b>1.1866</b> | <b>0.1695</b> | <b>1526</b> | <b>1771</b> | <b>2014</b> | <b>2277</b> | <b>2535</b> | <b>2763</b> | <b>2984</b> |
| 34               | 4        |   | 1.1810        | 0.1750        | 1461        | 1708        | 1952        | 2216        | 2475        | 2704        | 2926        |   | 1.1968        | 0.1679        | 1557        | 1805        | 2050        | 2315        | 2574        | 2804        | 3026        |
| 34               | 5        |   | 1.1911        | 0.1733        | 1491        | 1741        | 1986        | 2253        | 2513        | 2743        | 2967        |   | 1.2078        | 0.1663        | 1589        | 1839        | 2086        | 2353        | 2614        | 2844        | 3068        |
| 34               | 6        |   | 1.2019        | 0.1715        | 1522        | 1774        | 2021        | 2289        | 2551        | 2782        | 3007        |   | 1.2196        | 0.1646        | 1621        | 1874        | 2123        | 2391        | 2654        | 2885        | 3110        |
| 35               | 0        |   | 1.2134        | 0.1698        | 1553        | 1807        | 2056        | 2326        | 2590        | 2822        | 3047        |   | 1.2323        | 0.1629        | 1654        | 1909        | 2159        | 2430        | 2694        | 2926        | 3151        |
| 35               | 1        |   | 1.2258        | 0.1680        | 1585        | 1841        | 2092        | 2363        | 2628        | 2861        | 3087        |   | 1.2458        | 0.1611        | 1687        | 1944        | 2197        | 2469        | 2734        | 2967        | 3192        |
| 35               | 2        |   | 1.2390        | 0.1662        | 1617        | 1875        | 2128        | 2400        | 2666        | 2900        | 3126        |   | 1.2603        | 0.1593        | 1721        | 1980        | 2234        | 2507        | 2773        | 3007        | 3233        |
| <b>35</b>        | <b>3</b> |   | <b>1.2530</b> | <b>0.1643</b> | <b>1649</b> | <b>1909</b> | <b>2163</b> | <b>2438</b> | <b>2704</b> | <b>2939</b> | <b>3165</b> |   | <b>1.2756</b> | <b>0.1575</b> | <b>1755</b> | <b>2016</b> | <b>2272</b> | <b>2546</b> | <b>2813</b> | <b>3047</b> | <b>3274</b> |
| 35               | 4        |   | 1.2678        | 0.1624        | 1682        | 1944        | 2200        | 2475        | 2742        | 2977        | 3204        |   | 1.2919        | 0.1557        | 1790        | 2053        | 2309        | 2585        | 2853        | 3087        | 3314        |
| 35               | 5        |   | 1.2834        | 0.1605        | 1715        | 1978        | 2236        | 2512        | 2780        | 3015        | 3242        |   | 1.3091        | 0.1538        | 1825        | 2089        | 2347        | 2624        | 2892        | 3127        | 3354        |
| 35               | 6        |   | 1.2998        | 0.1586        | 1748        | 2013        | 2272        | 2549        | 2818        | 3053        | 3280        |   | 1.3272        | 0.1519        | 1860        | 2126        | 2385        | 2663        | 2931        | 3166        | 3393        |
| 36               | 0        |   | 1.3170        | 0.1566        | 1782        | 2049        | 2308        | 2586        | 2855        | 3090        | 3317        |   | 1.3462        | 0.1499        | 1895        | 2163        | 2423        | 2702        | 2970        | 3205        | 3431        |
| 36               | 1        |   | 1.3349        | 0.1546        | 1815        | 2084        | 2345        | 2623        | 2892        | 3127        | 3354        |   | 1.3659        | 0.1480        | 1931        | 2200        | 2461        | 2740        | 3009        | 3243        | 3469        |
| 36               | 2        |   | 1.3534        | 0.1526        | 1849        | 2119        | 2381        | 2660        | 2929        | 3164        | 3390        |   | 1.3864        | 0.1460        | 1966        | 2237        | 2499        | 2778        | 3047        | 3281        | 3506        |
| <b>36</b>        | <b>3</b> |   | <b>1.3725</b> | <b>0.1506</b> | <b>1883</b> | <b>2154</b> | <b>2417</b> | <b>2696</b> | <b>2965</b> | <b>3199</b> | <b>3425</b> |   | <b>1.4076</b> | <b>0.1440</b> | <b>2002</b> | <b>2274</b> | <b>2537</b> | <b>2816</b> | <b>3085</b> | <b>3318</b> | <b>3542</b> |
| 36               | 4        |   | 1.3920        | 0.1486        | 1918        | 2190        | 2452        | 2732        | 3000        | 3234        | 3459        |   | 1.4293        | 0.1420        | 2038        | 2311        | 2574        | 2854        | 3122        | 3355        | 3578        |
| 36               | 5        |   | 1.4118        | 0.1465        | 1952        | 2225        | 2488        | 2767        | 3035        | 3269        | 3492        |   | 1.4513        | 0.1400        | 2074        | 2348        | 2611        | 2890        | 3158        | 3390        | 3613        |
| 36               | 6        |   | 1.4317        | 0.1445        | 1986        | 2259        | 2523        | 2802        | 3070        | 3302        | 3525        |   | 1.4736        | 0.1380        | 2110        | 2385        | 2648        | 2927        | 3194        | 3425        | 3646        |

| GA<br>(wks+days) |          | Girls         |               |             |             |             |             |             |             |             | Boys          |               |             |             |             |             |             |             |             |
|------------------|----------|---------------|---------------|-------------|-------------|-------------|-------------|-------------|-------------|-------------|---------------|---------------|-------------|-------------|-------------|-------------|-------------|-------------|-------------|
| wks              | days     | L             | S             | 3rd         | 10th        | 25th        | 50th (M)    | 75th        | 90th        | 97th        | L             | S             | 3rd         | 10th        | 25th        | 50th (M)    | 75th        | 90th        | 97th        |
| 37               | 0        | 1.4516        | 0.1425        | 2020        | 2294        | 2557        | 2836        | 3103        | 3335        | 3556        | 1.4959        | 0.1360        | 2146        | 2421        | 2684        | 2963        | 3228        | 3459        | 3679        |
| 37               | 1        | 1.4713        | 0.1405        | 2054        | 2328        | 2591        | 2870        | 3136        | 3367        | 3587        | 1.5181        | 0.1340        | 2182        | 2457        | 2720        | 2998        | 3263        | 3492        | 3711        |
| 37               | 2        | 1.4905        | 0.1385        | 2088        | 2362        | 2625        | 2902        | 3168        | 3397        | 3617        | 1.5397        | 0.1320        | 2217        | 2492        | 2755        | 3032        | 3296        | 3524        | 3741        |
| <b>37</b>        | <b>3</b> | <b>1.5090</b> | <b>0.1365</b> | <b>2121</b> | <b>2395</b> | <b>2658</b> | <b>2934</b> | <b>3199</b> | <b>3427</b> | <b>3645</b> | <b>1.5607</b> | <b>0.1300</b> | <b>2253</b> | <b>2527</b> | <b>2789</b> | <b>3065</b> | <b>3328</b> | <b>3555</b> | <b>3771</b> |
| 37               | 4        | 1.5266        | 0.1345        | 2154        | 2428        | 2690        | 2966        | 3229        | 3456        | 3673        | 1.5808        | 0.1281        | 2287        | 2562        | 2823        | 3098        | 3359        | 3585        | 3800        |
| 37               | 5        | 1.5429        | 0.1326        | 2186        | 2460        | 2721        | 2996        | 3258        | 3484        | 3700        | 1.5996        | 0.1262        | 2322        | 2595        | 2856        | 3130        | 3390        | 3614        | 3827        |
| 37               | 6        | 1.5579        | 0.1308        | 2218        | 2491        | 2751        | 3025        | 3286        | 3511        | 3726        | 1.6168        | 0.1244        | 2355        | 2628        | 2888        | 3160        | 3419        | 3642        | 3854        |
| 38               | 0        | 1.5711        | 0.1290        | 2250        | 2522        | 2781        | 3054        | 3313        | 3537        | 3750        | 1.6323        | 0.1226        | 2389        | 2660        | 2919        | 3190        | 3447        | 3669        | 3879        |
| 38               | 1        | 1.5823        | 0.1273        | 2281        | 2551        | 2809        | 3081        | 3339        | 3562        | 3774        | 1.6456        | 0.1208        | 2421        | 2691        | 2949        | 3218        | 3474        | 3694        | 3904        |
| 38               | 2        | 1.5915        | 0.1256        | 2311        | 2580        | 2837        | 3107        | 3364        | 3586        | 3797        | 1.6566        | 0.1192        | 2453        | 2722        | 2977        | 3246        | 3500        | 3719        | 3927        |
| <b>38</b>        | <b>3</b> | <b>1.5982</b> | <b>0.1240</b> | <b>2340</b> | <b>2608</b> | <b>2863</b> | <b>3132</b> | <b>3388</b> | <b>3609</b> | <b>3819</b> | <b>1.6650</b> | <b>0.1176</b> | <b>2483</b> | <b>2751</b> | <b>3005</b> | <b>3272</b> | <b>3525</b> | <b>3743</b> | <b>3950</b> |
| 38               | 4        | 1.6024        | 0.1224        | 2368        | 2634        | 2889        | 3156        | 3411        | 3630        | 3840        | 1.6706        | 0.1160        | 2513        | 2779        | 3032        | 3297        | 3549        | 3765        | 3971        |
| 38               | 5        | 1.6041        | 0.1210        | 2395        | 2660        | 2913        | 3179        | 3433        | 3651        | 3860        | 1.6734        | 0.1146        | 2542        | 2806        | 3057        | 3321        | 3571        | 3787        | 3992        |
| 38               | 6        | 1.6030        | 0.1196        | 2422        | 2685        | 2936        | 3201        | 3453        | 3671        | 3879        | 1.6731        | 0.1132        | 2570        | 2832        | 3081        | 3344        | 3593        | 3807        | 4012        |
| 39               | 0        | 1.5991        | 0.1183        | 2447        | 2708        | 2958        | 3222        | 3473        | 3690        | 3897        | 1.6697        | 0.1119        | 2597        | 2856        | 3104        | 3365        | 3613        | 3827        | 4031        |
| 39               | 1        | 1.5926        | 0.1171        | 2471        | 2730        | 2979        | 3241        | 3492        | 3708        | 3915        | 1.6633        | 0.1107        | 2622        | 2880        | 3126        | 3386        | 3633        | 3846        | 4049        |
| 39               | 2        | 1.5834        | 0.1160        | 2494        | 2751        | 2998        | 3260        | 3509        | 3725        | 3932        | 1.6539        | 0.1096        | 2646        | 2902        | 3147        | 3405        | 3651        | 3864        | 4066        |
| <b>39</b>        | <b>3</b> | <b>1.5717</b> | <b>0.1150</b> | <b>2516</b> | <b>2771</b> | <b>3017</b> | <b>3277</b> | <b>3526</b> | <b>3742</b> | <b>3948</b> | <b>1.6417</b> | <b>0.1086</b> | <b>2670</b> | <b>2923</b> | <b>3166</b> | <b>3423</b> | <b>3668</b> | <b>3880</b> | <b>4083</b> |
| 39               | 4        | 1.5577        | 0.1141        | 2536        | 2790        | 3034        | 3294        | 3542        | 3757        | 3964        | 1.6268        | 0.1076        | 2691        | 2943        | 3185        | 3441        | 3685        | 3897        | 4099        |
| 39               | 5        | 1.5416        | 0.1133        | 2556        | 2807        | 3051        | 3309        | 3557        | 3772        | 3979        | 1.6094        | 0.1068        | 2712        | 2961        | 3202        | 3457        | 3700        | 3912        | 4114        |
| 39               | 6        | 1.5235        | 0.1126        | 2574        | 2824        | 3066        | 3323        | 3571        | 3786        | 3993        | 1.5898        | 0.1061        | 2731        | 2979        | 3218        | 3472        | 3715        | 3926        | 4128        |
| 40               | 0        | 1.5038        | 0.1119        | 2591        | 2839        | 3080        | 3337        | 3584        | 3800        | 4007        | 1.5683        | 0.1054        | 2749        | 2995        | 3233        | 3486        | 3729        | 3940        | 4143        |
| 40               | 1        | 1.4828        | 0.1114        | 2606        | 2853        | 3093        | 3350        | 3597        | 3813        | 4020        | 1.5452        | 0.1048        | 2766        | 3010        | 3247        | 3499        | 3742        | 3953        | 4156        |
| 40               | 2        | 1.4607        | 0.1109        | 2621        | 2866        | 3105        | 3361        | 3609        | 3825        | 4033        | 1.5207        | 0.1044        | 2781        | 3024        | 3259        | 3511        | 3754        | 3966        | 4169        |
| <b>40</b>        | <b>3</b> | <b>1.4379</b> | <b>0.1106</b> | <b>2634</b> | <b>2878</b> | <b>3116</b> | <b>3372</b> | <b>3620</b> | <b>3836</b> | <b>4045</b> | <b>1.4954</b> | <b>0.1040</b> | <b>2795</b> | <b>3036</b> | <b>3271</b> | <b>3523</b> | <b>3766</b> | <b>3978</b> | <b>4182</b> |
| 40               | 4        | 1.4145        | 0.1103        | 2646        | 2889        | 3127        | 3382        | 3630        | 3847        | 4057        | 1.4694        | 0.1037        | 2808        | 3048        | 3282        | 3533        | 3776        | 3989        | 4194        |
| 40               | 5        | 1.3909        | 0.1101        | 2657        | 2899        | 3136        | 3392        | 3640        | 3858        | 4069        | 1.4430        | 0.1034        | 2820        | 3058        | 3292        | 3543        | 3787        | 4000        | 4206        |
| 40               | 6        | 1.3673        | 0.1100        | 2667        | 2908        | 3145        | 3401        | 3649        | 3868        | 4080        | 1.4166        | 0.1033        | 2830        | 3068        | 3301        | 3552        | 3796        | 4010        | 4217        |
| 41               | 0        | 1.3439        | 0.1099        | 2675        | 2916        | 3153        | 3409        | 3658        | 3878        | 4091        | 1.3904        | 0.1032        | 2840        | 3077        | 3309        | 3561        | 3805        | 4020        | 4228        |
| 41               | 1        | 1.3210        | 0.1099        | 2683        | 2923        | 3160        | 3416        | 3666        | 3887        | 4101        | 1.3646        | 0.1032        | 2848        | 3084        | 3317        | 3568        | 3814        | 4030        | 4239        |
| 41               | 2        | 1.2987        | 0.1100        | 2690        | 2929        | 3166        | 3423        | 3674        | 3896        | 4111        | 1.3394        | 0.1032        | 2855        | 3091        | 3324        | 3576        | 3822        | 4039        | 4249        |
| <b>41</b>        | <b>3</b> | <b>1.2771</b> | <b>0.1102</b> | <b>2696</b> | <b>2935</b> | <b>3172</b> | <b>3429</b> | <b>3682</b> | <b>3905</b> | <b>4121</b> | <b>1.3151</b> | <b>0.1034</b> | <b>2862</b> | <b>3097</b> | <b>3330</b> | <b>3582</b> | <b>3829</b> | <b>4048</b> | <b>4259</b> |
| 41               | 4        | 1.2564        | 0.1104        | 2700        | 2940        | 3177        | 3435        | 3689        | 3913        | 4131        | 1.2916        | 0.1036        | 2867        | 3102        | 3335        | 3588        | 3837        | 4056        | 4269        |
| 41               | 5        | 1.2366        | 0.1107        | 2704        | 2944        | 3181        | 3440        | 3695        | 3921        | 4141        | 1.2692        | 0.1038        | 2872        | 3107        | 3340        | 3594        | 3843        | 4064        | 4279        |
| 41               | 6        | 1.2178        | 0.1110        | 2708        | 2947        | 3185        | 3445        | 3701        | 3929        | 4150        | 1.2479        | 0.1041        | 2875        | 3110        | 3344        | 3599        | 3850        | 4072        | 4288        |
| 42               | 0        | 1.2000        | 0.1114        | 2710        | 2950        | 3189        | 3450        | 3707        | 3936        | 4159        | 1.2278        | 0.1045        | 2878        | 3113        | 3348        | 3604        | 3856        | 4079        | 4298        |
